# Supplementary material for: Pyridoxine-derived bicyclic aminopyridinol antioxidants: synthesis and their antioxidant activities
Source: Royal Society of Chemistry journal article supplement (doi:10.1039/c1ob05144j), 2011-01-01

## Supplementary Information

# Pyridoxine-Derived Bicyclic Aminopyridinol Antioxidants; Synthesis and Their Antioxidant Activities

**Tae-gyu Nam,<sup>a,b</sup> Jin-Mo Ku,<sup>c</sup> Christopher L. Rector,<sup>a</sup> Hoyoung Choi,<sup>d</sup> Ned A. Porter<sup>\*a</sup> and  
Byeong-Seon Jeong<sup>\*d</sup>**

<sup>a</sup>*Department of Chemistry, Vanderbilt University, Nashville, Tennessee 37235, USA. Fax: +1-615-343-5478, Tel: +1-615-343-2693; E-mail: n.porter@vanderbilt.edu.*

<sup>b</sup>*College of Pharmacy, Hanyang University, Ansan 426-791, Republic of Korea.*

<sup>c</sup>*Gyeonggi Bio-Center, Suwon 443-270, Republic of Korea*

<sup>d</sup>*College of Pharmacy, Yeungnam University, Gyeongsan 712-749, Republic of Korea. Fax: +82-53-810-4654, Tel: +82-53-810-2814; E-mail: jeongb@ynu.ac.kr.*

## $^1\text{H}$ - and $^{13}\text{C}$ -NMR spectra for all new compounds

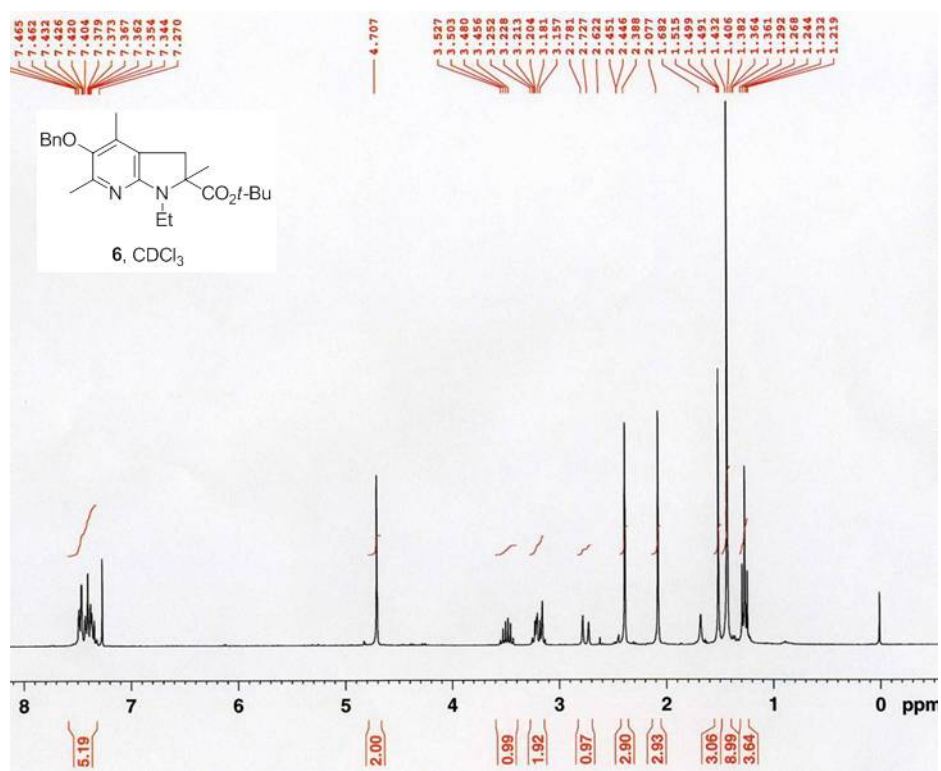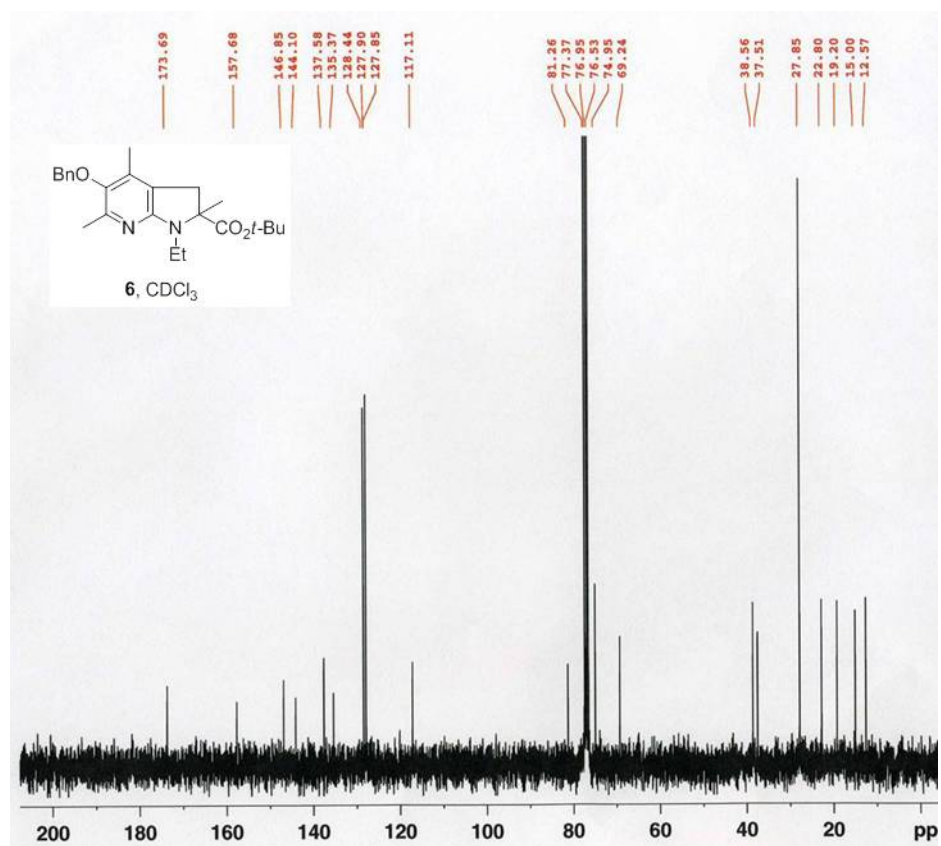

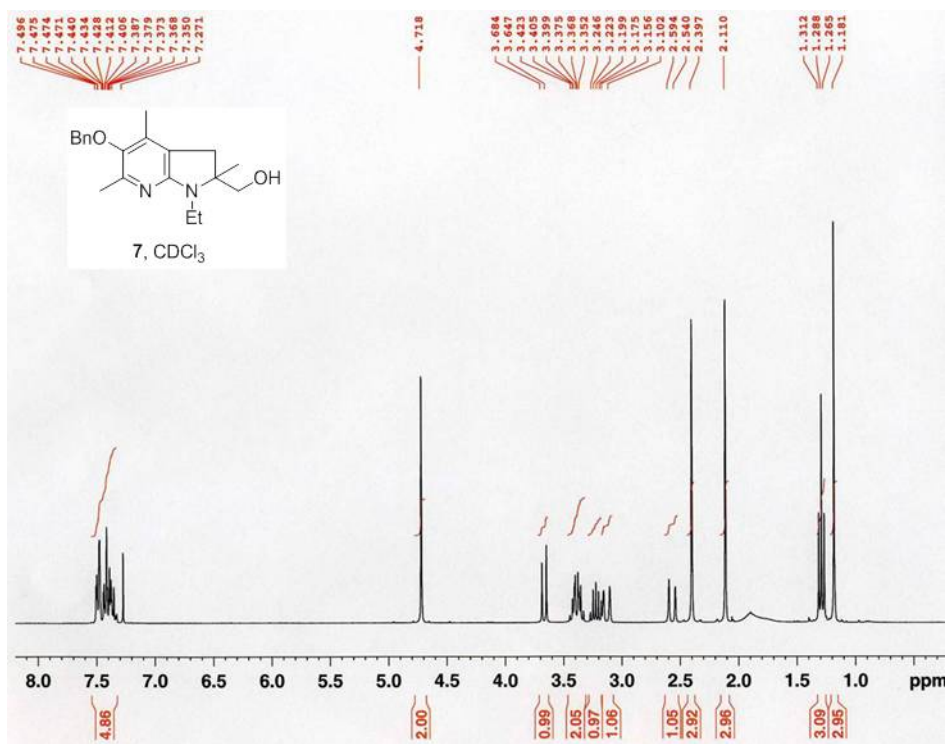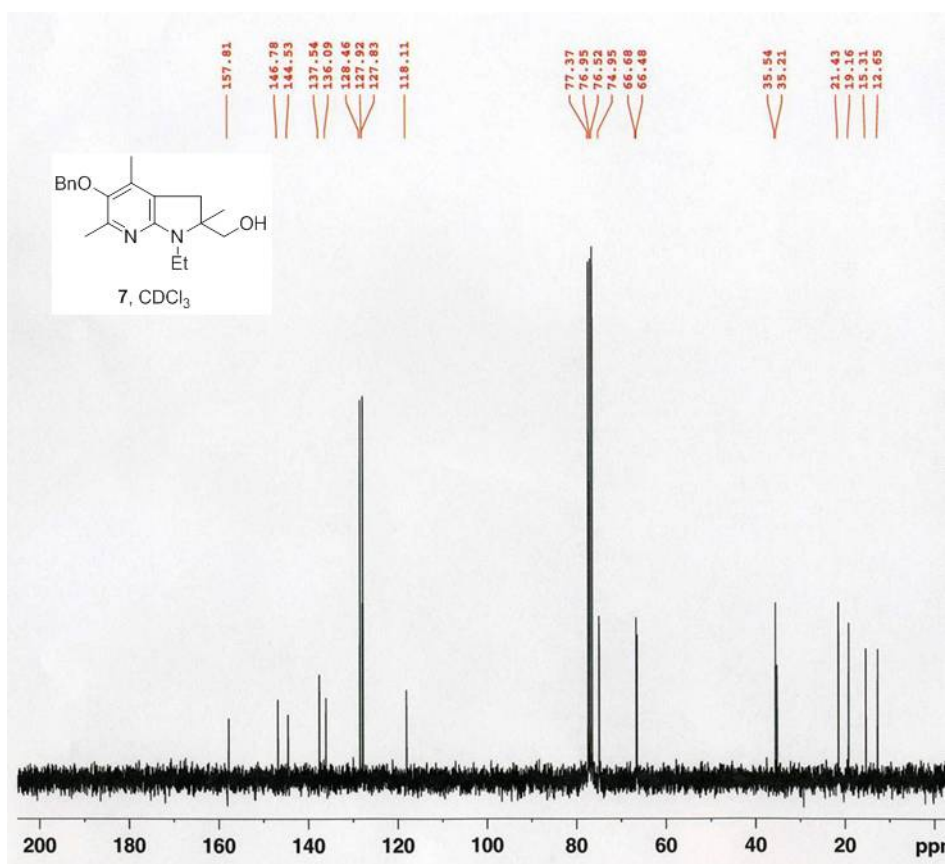

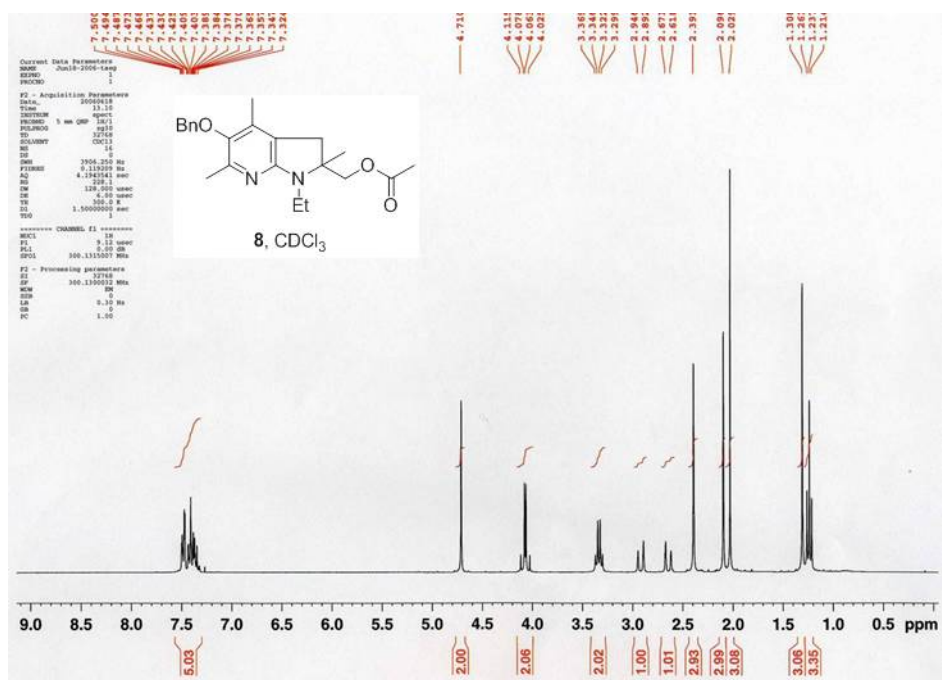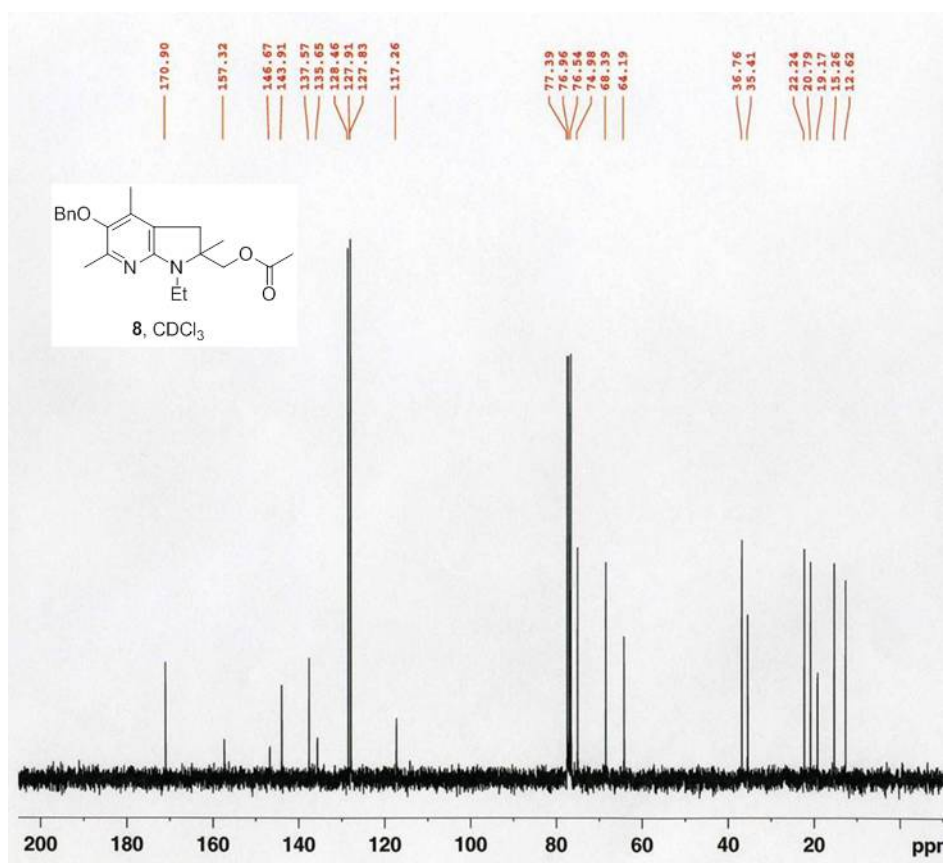

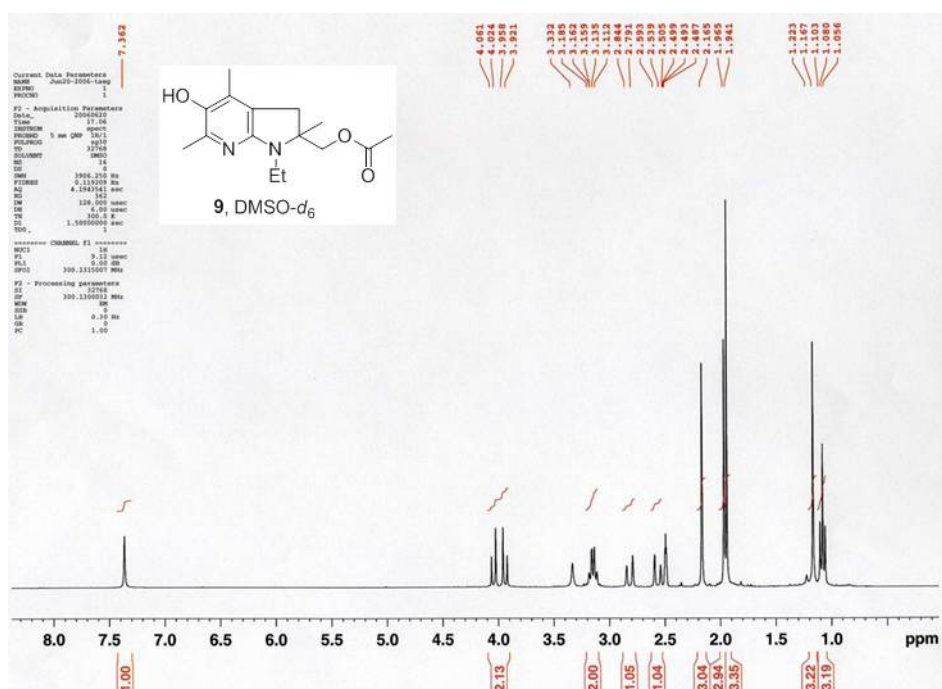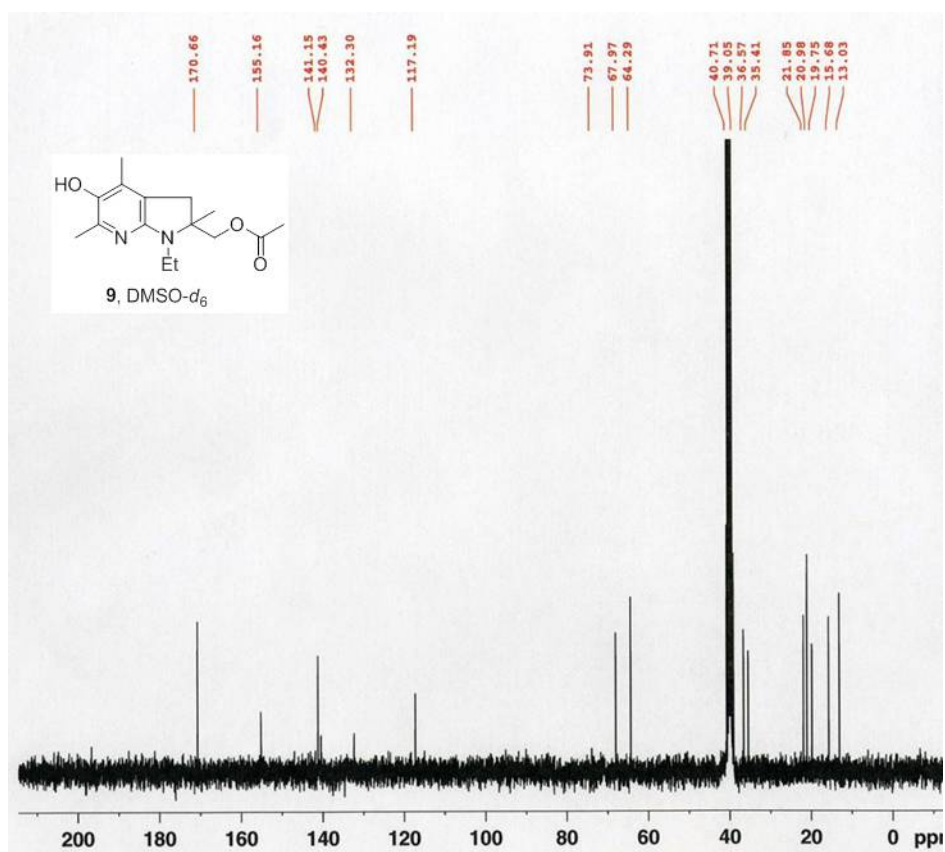

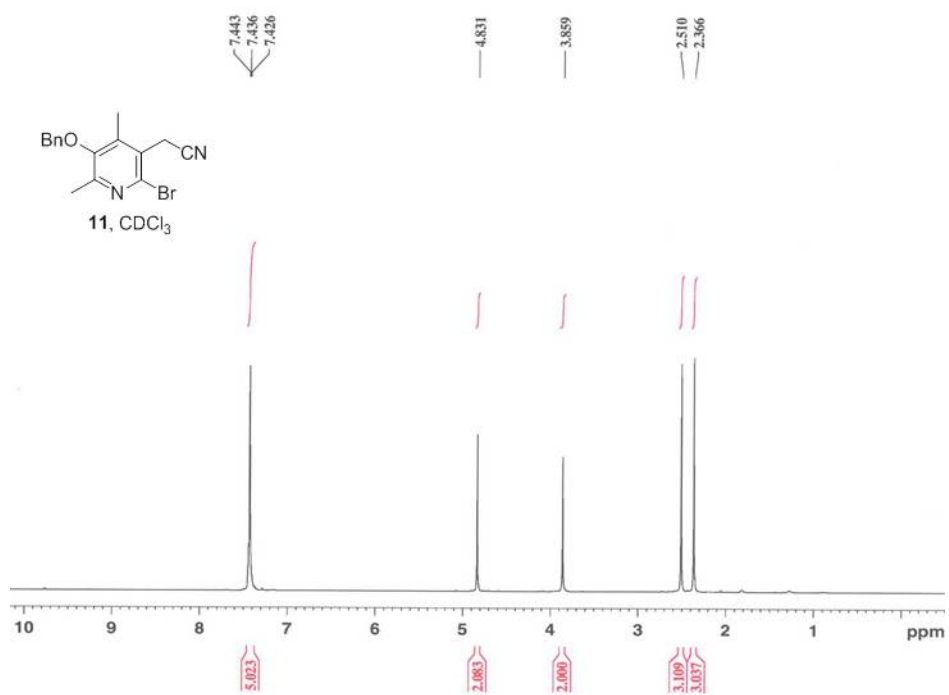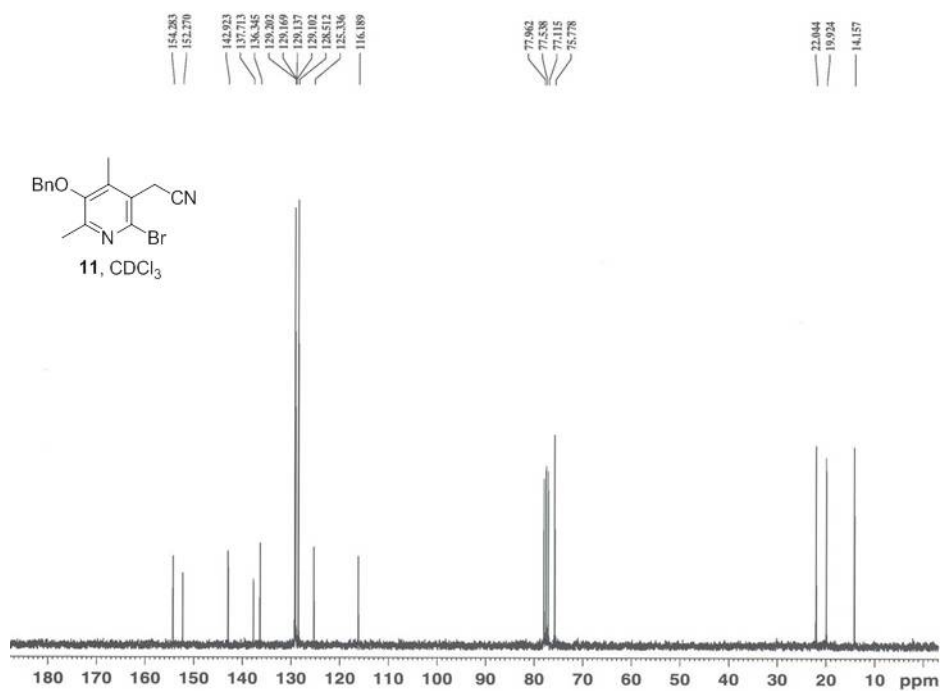



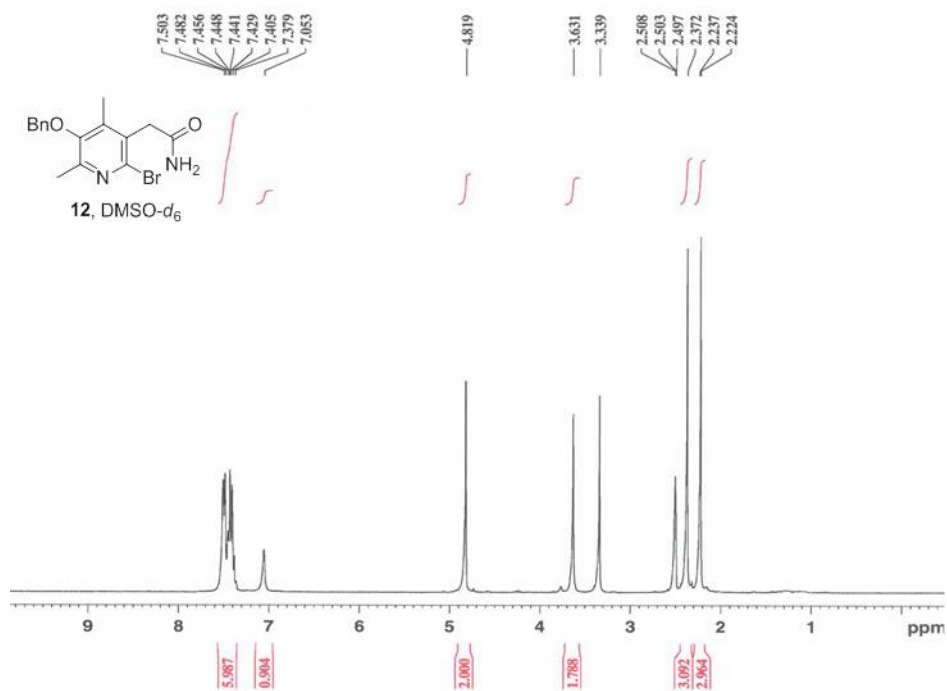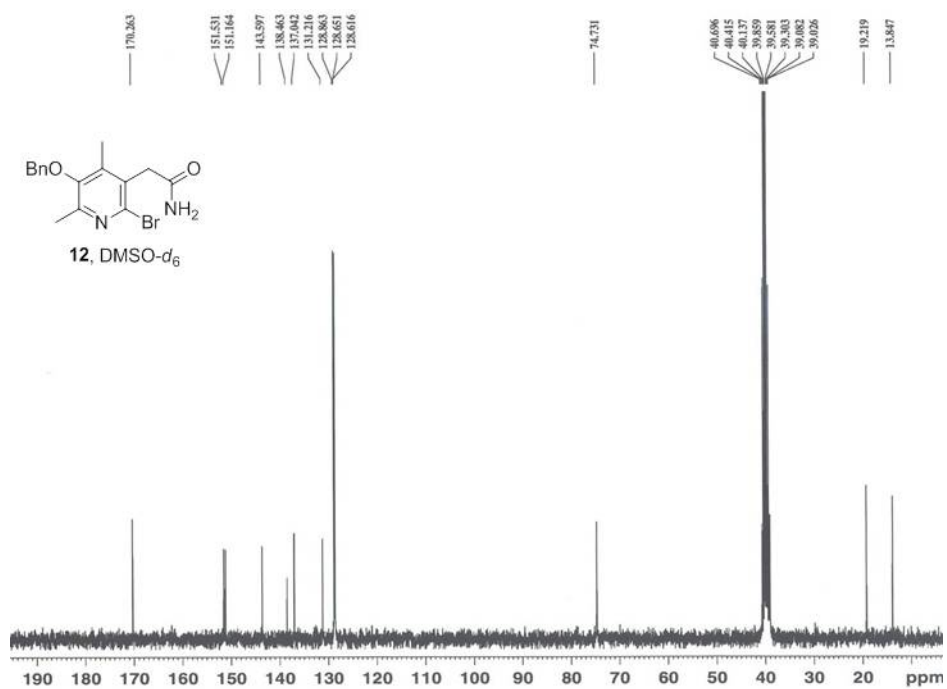

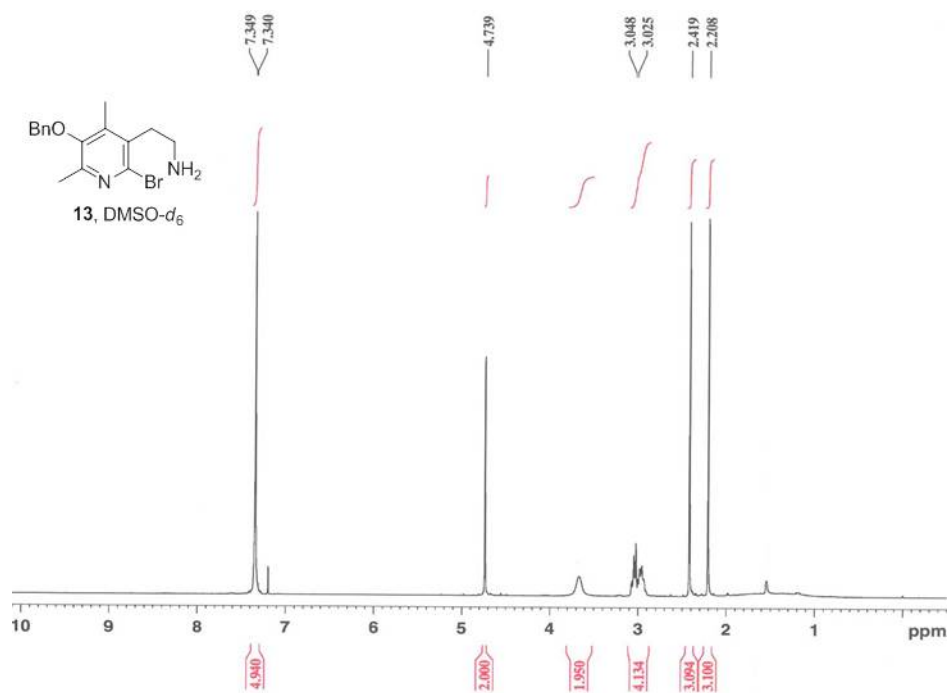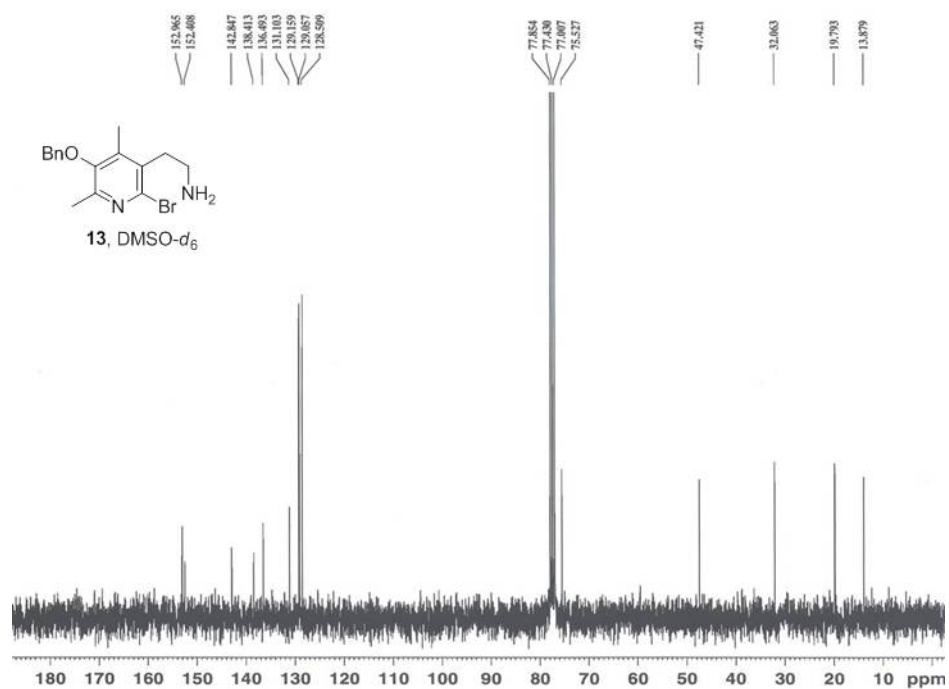



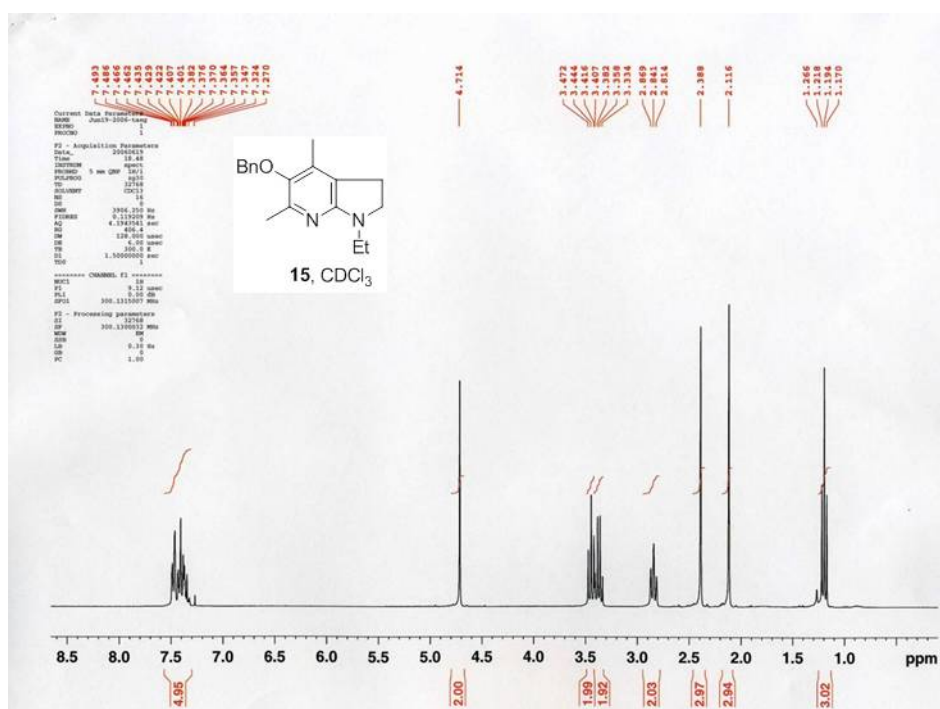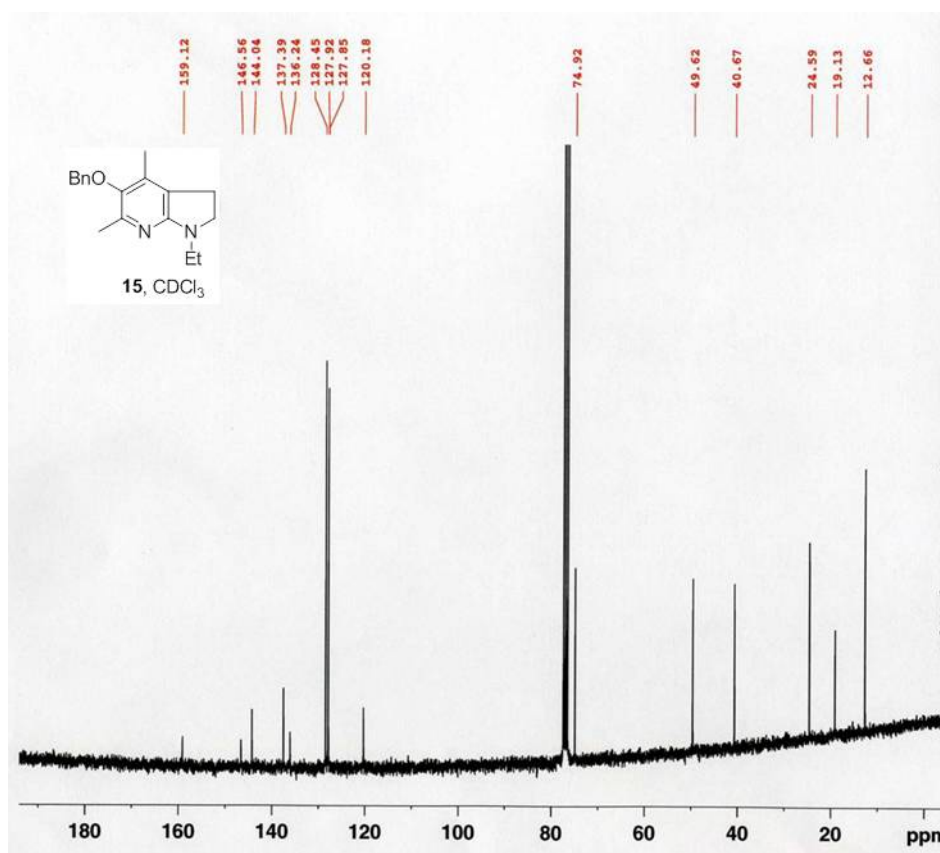

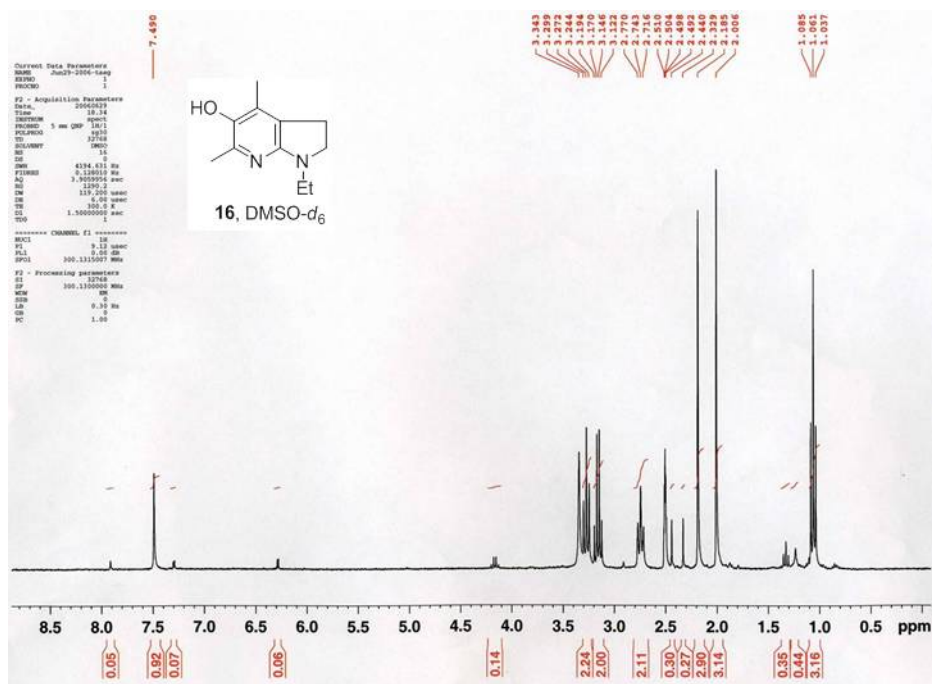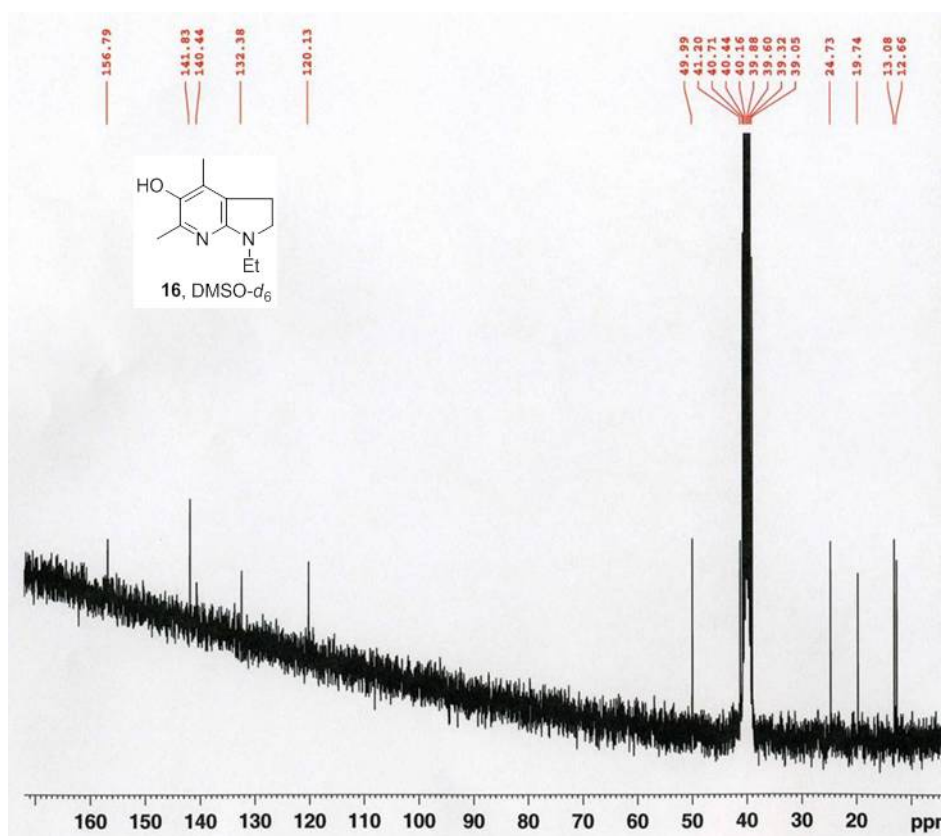

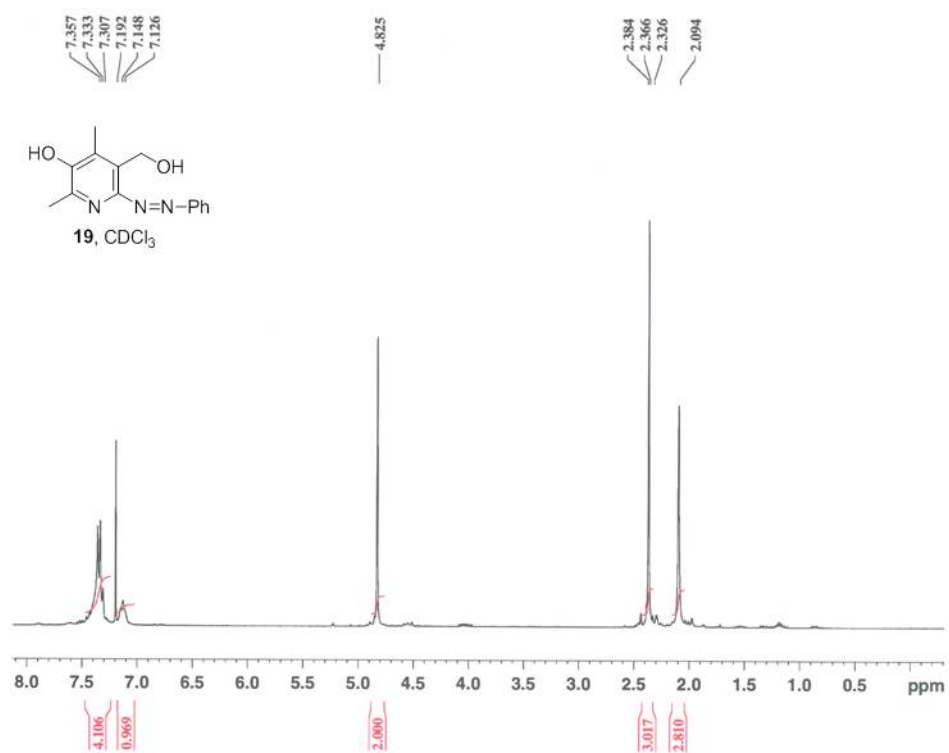

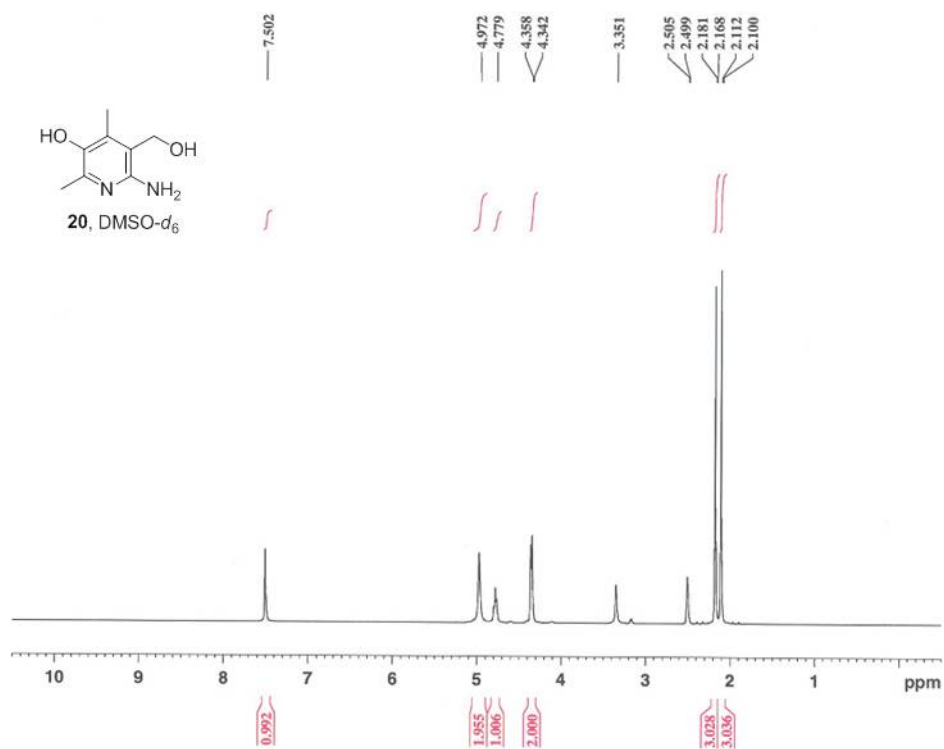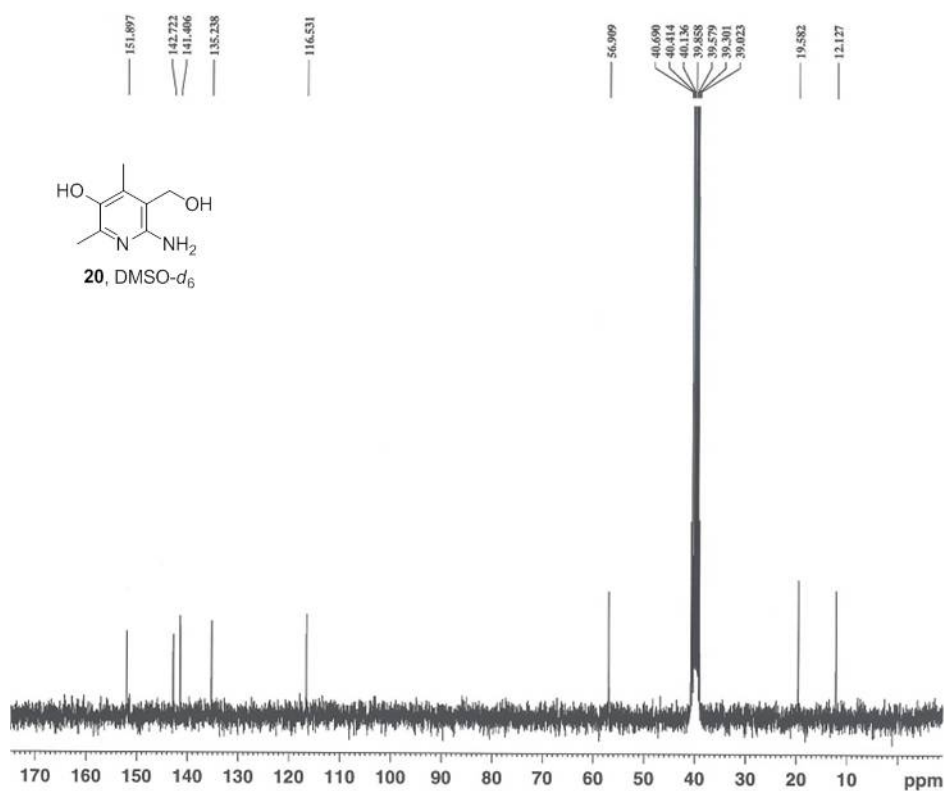

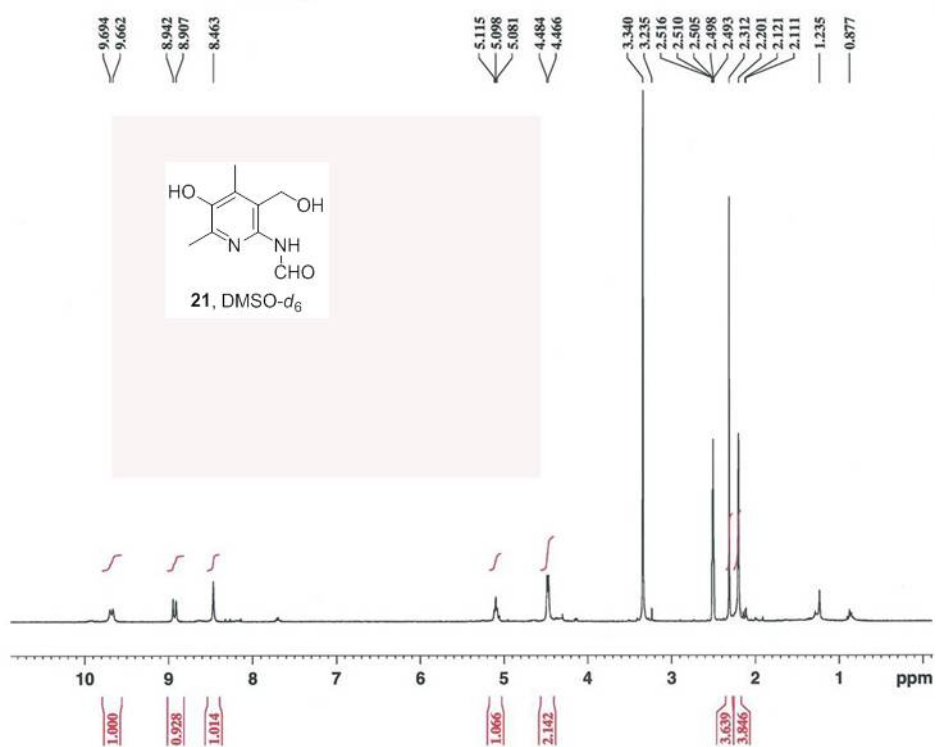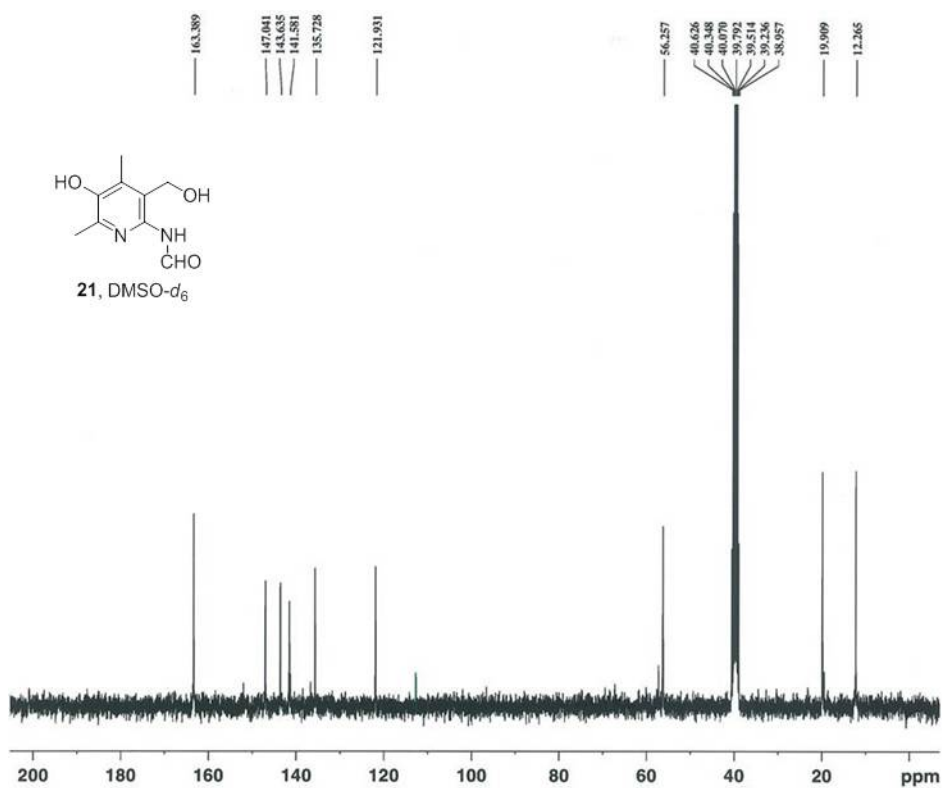

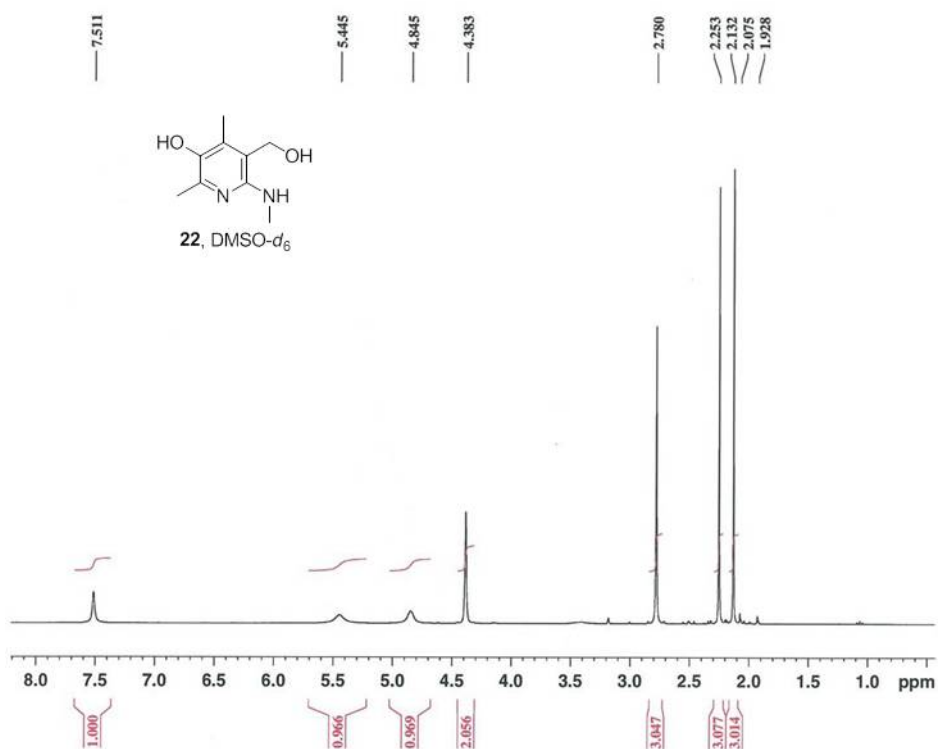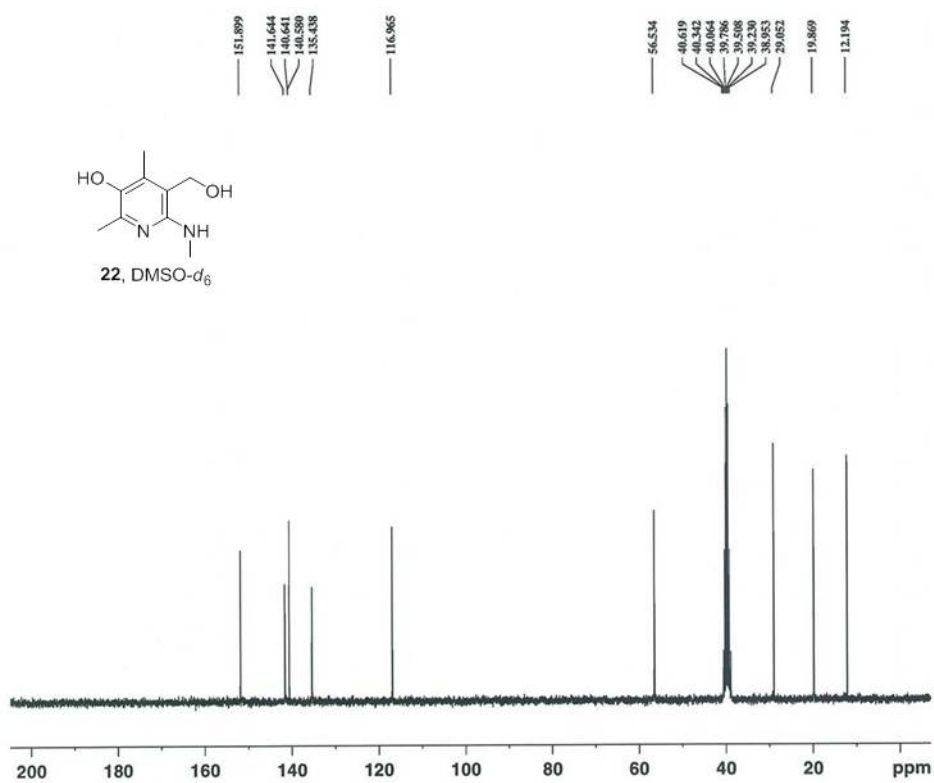

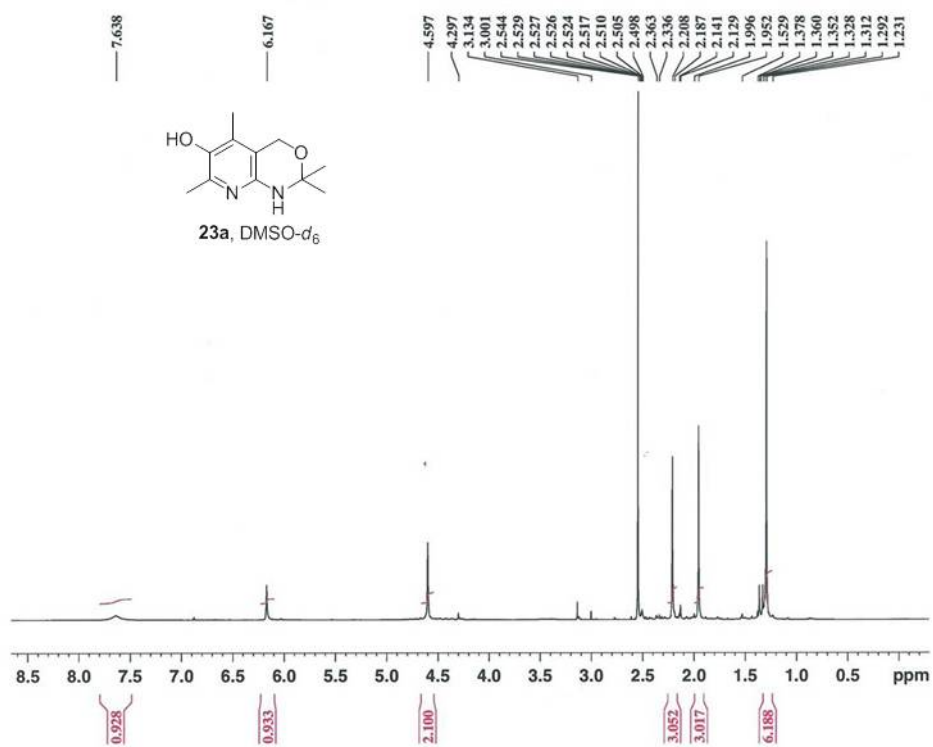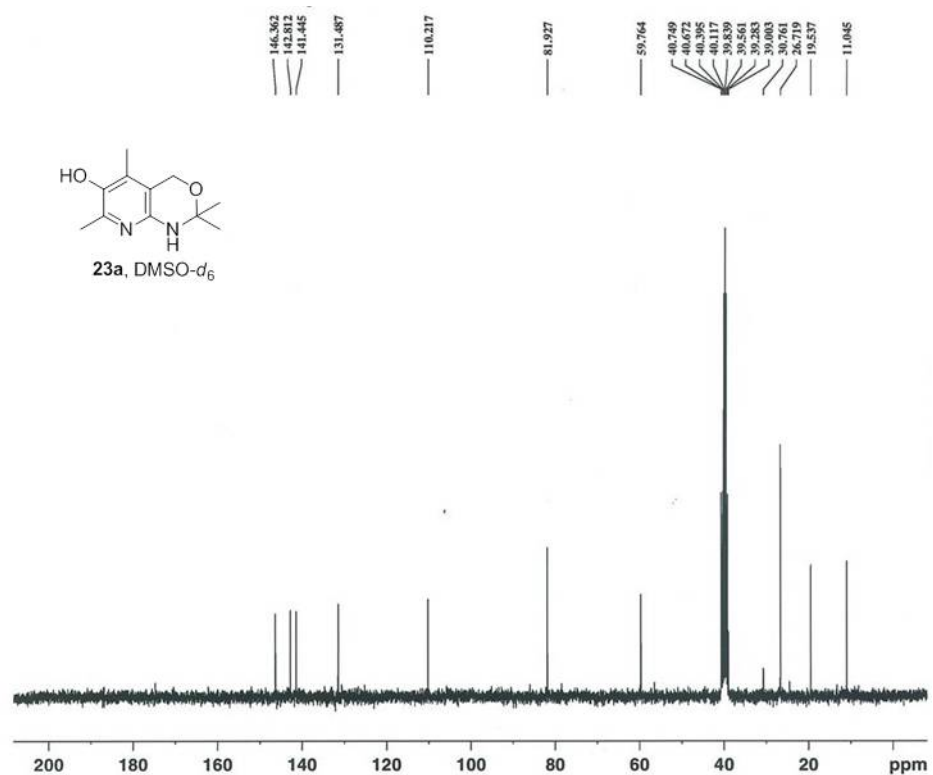



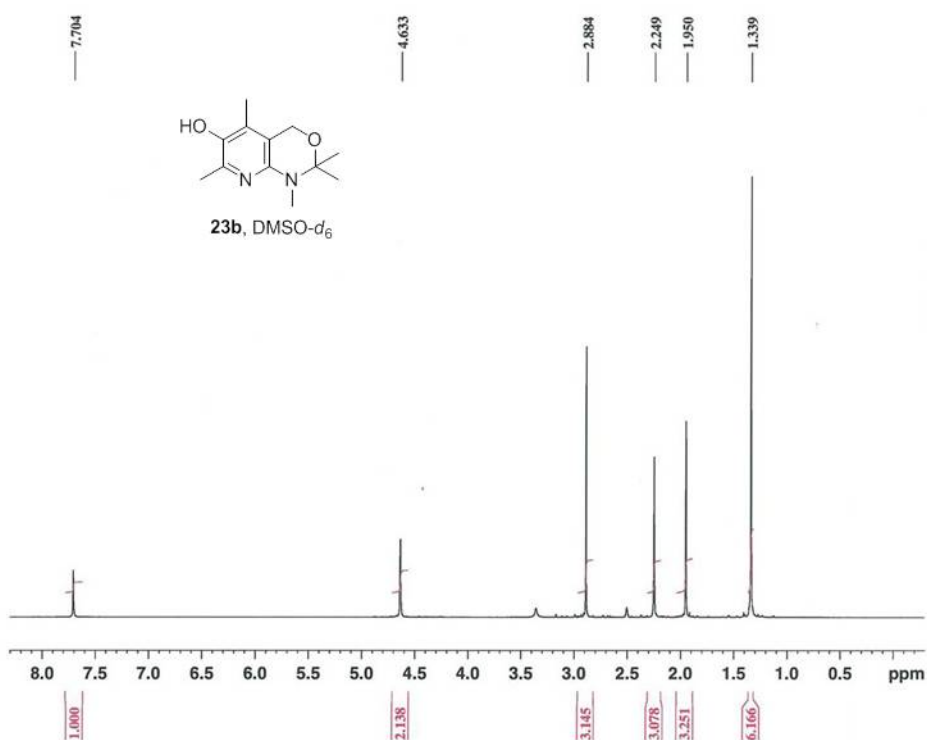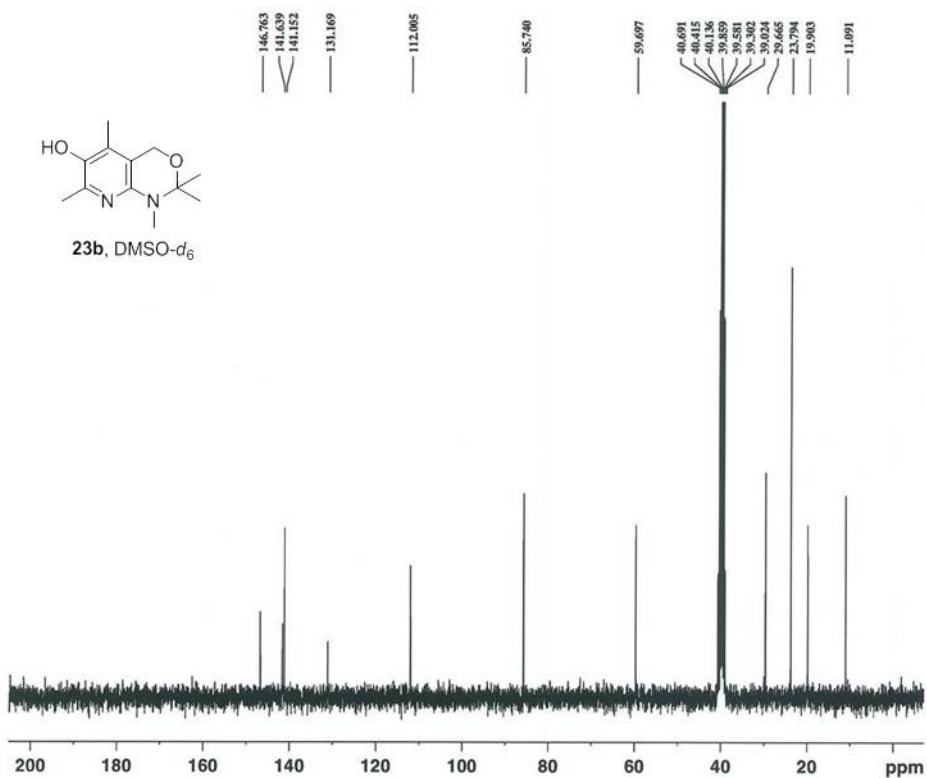

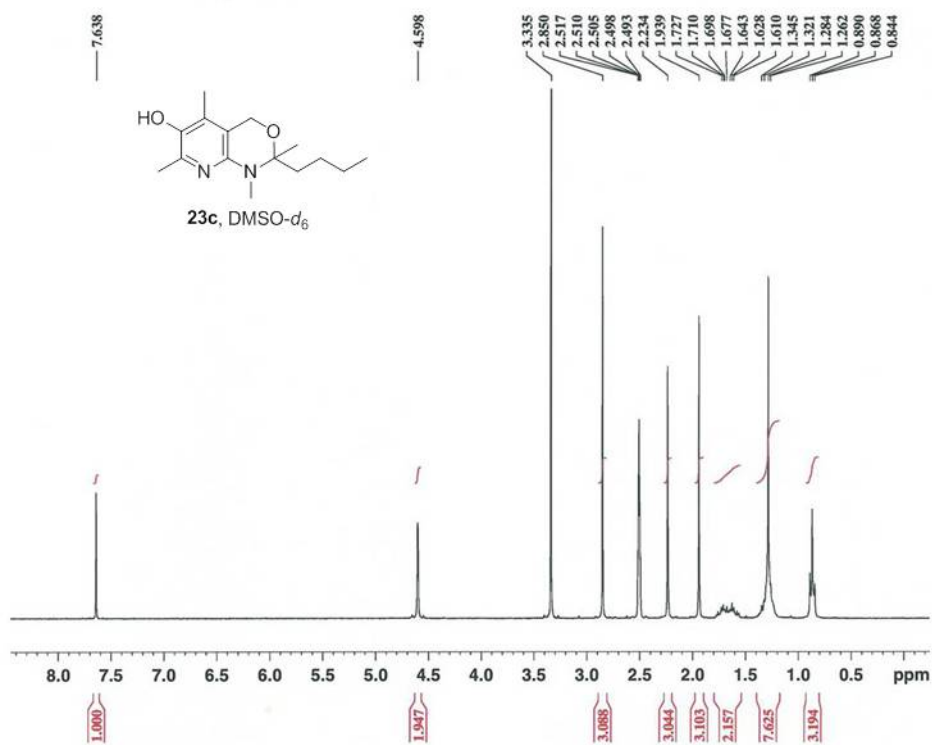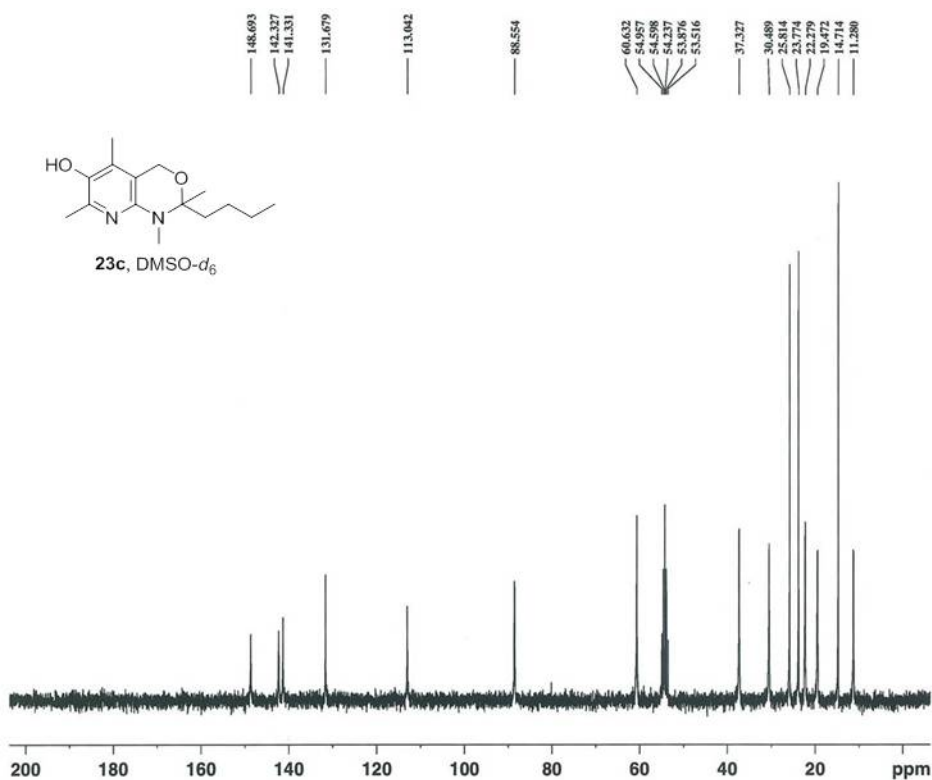

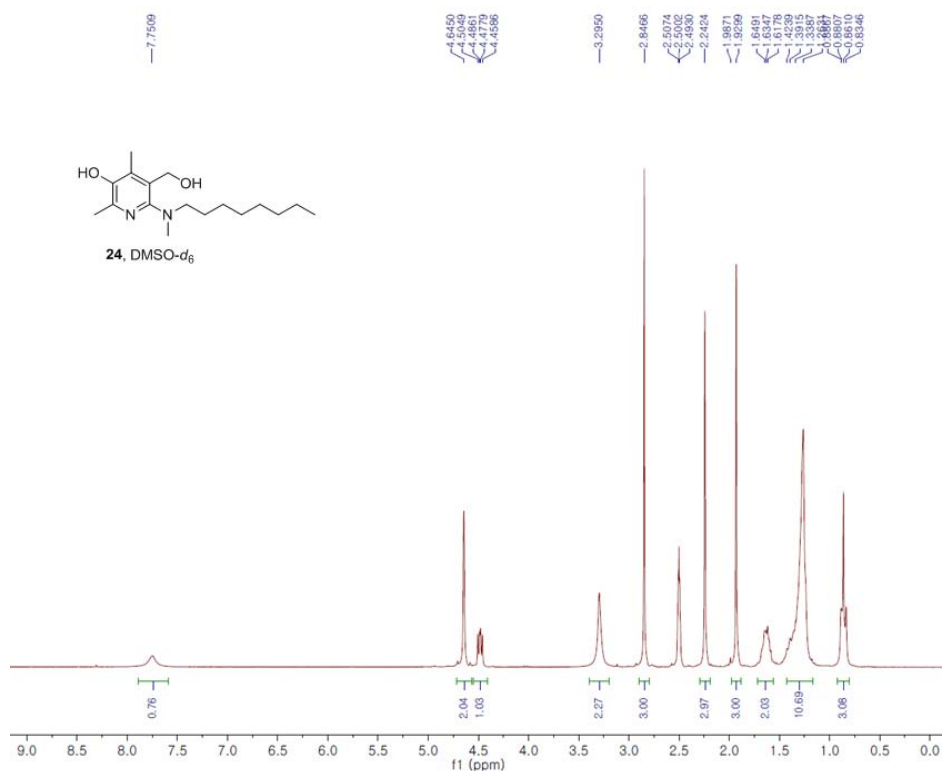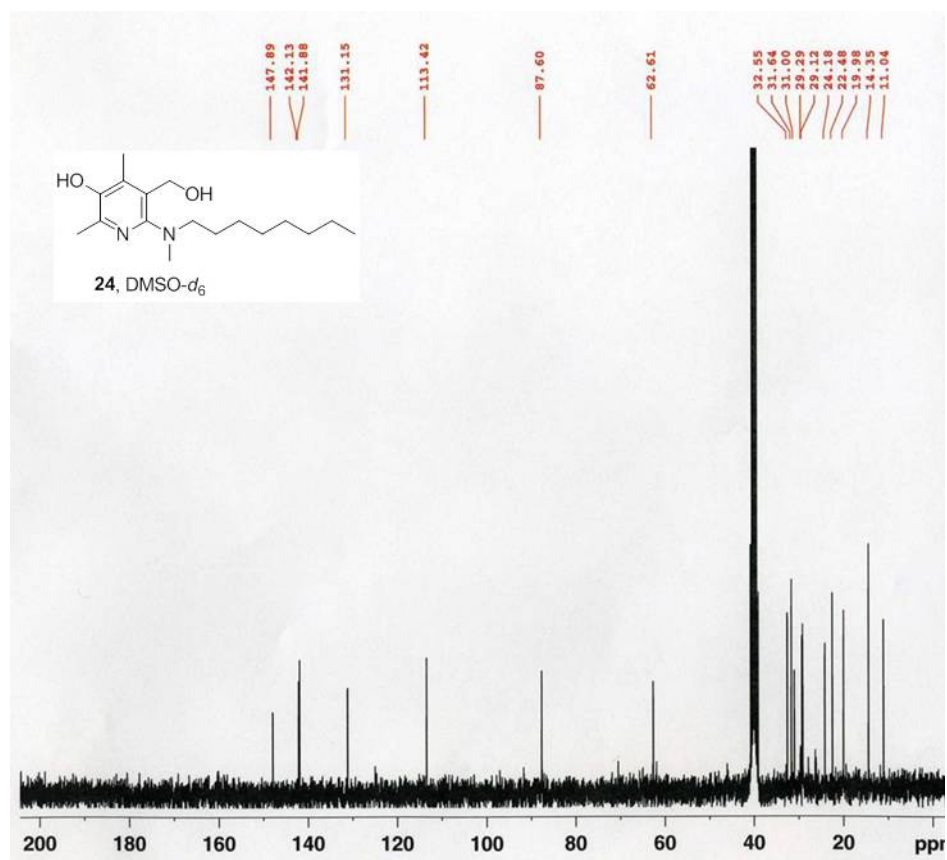

Supplement: c1ob05144j.pdf [file c1ob05144j.pdf]
